# Supplementary material for: In-plane porous Co3O4 nanosheet assembled 3D hierarchical clusters grown on stainless steel mesh as binder-free anodes for high performance lithium ion batteries
Source: Royal Society of Chemistry journal article supplement (doi:10.1039/c8ta00068a), 2018-01-01
Supplement: c8ta00068a1.pdf [file c8ta00068a1.pdf]

## Electronic supplementary information

# In-plane porous $\text{Co}_3\text{O}_4$ nanosheets assembled 3D hierarchical clusters grown on stainless steel mesh as binder-free anodes for high performance lithium ion batteries

Qinxing Xie,<sup>a\*</sup> Rui Song,<sup>a</sup> Peng Zhao,<sup>b</sup> Yufeng Zhang,<sup>a</sup> Shihua Wu<sup>b</sup>, and Dongliang Xie<sup>a</sup>

<sup>a</sup> Tianjin Key Laboratory of Advanced Fibers and Energy Storage, School of Materials Science and Engineering, Tianjin Polytechnic University, Tianjin 300387, China

<sup>b</sup> Department of Chemistry, Nankai University, Tianjin 300017, China

\* Corresponding author. Tianjin Key Laboratory of Advanced Fibers and Energy Storage, School of Materials Science and Engineering, Tianjin Polytechnic University, Tianjin 300387, China. Email address: qxxie@yahoo.com (Q. Xie)

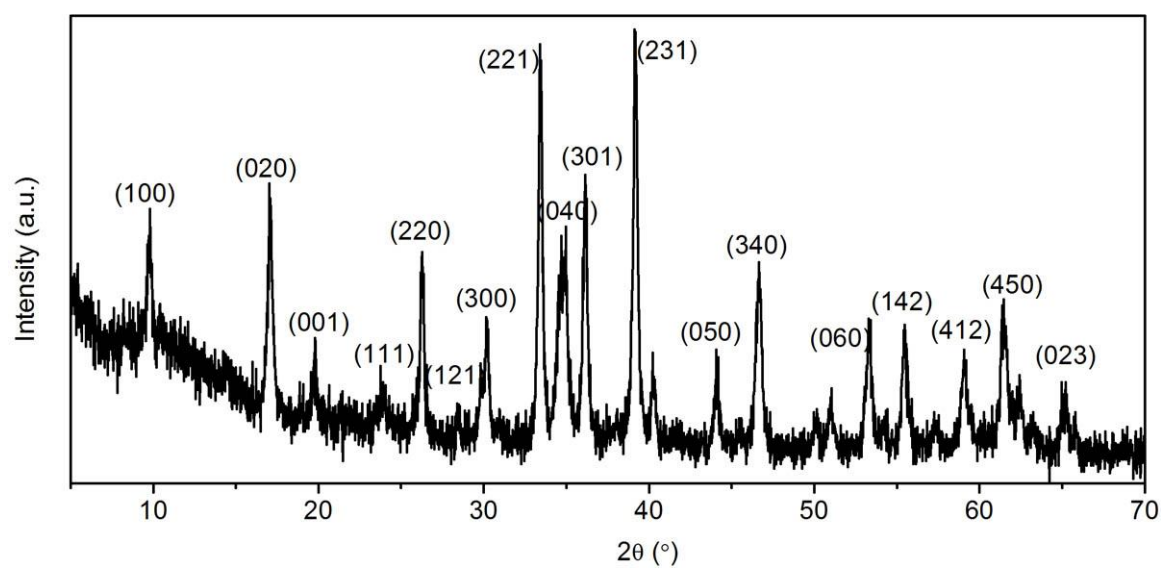

**Figure S1.** XRD pattern of the intermediate synthesized using the hydrothermal method, the diffraction peaks can be indexed to the orthorhombic  $\text{Co}(\text{CO}_3)_{0.5}(\text{OH}) \cdot 0.11\text{H}_2\text{O}$  (JCPDS No. 48-0083).

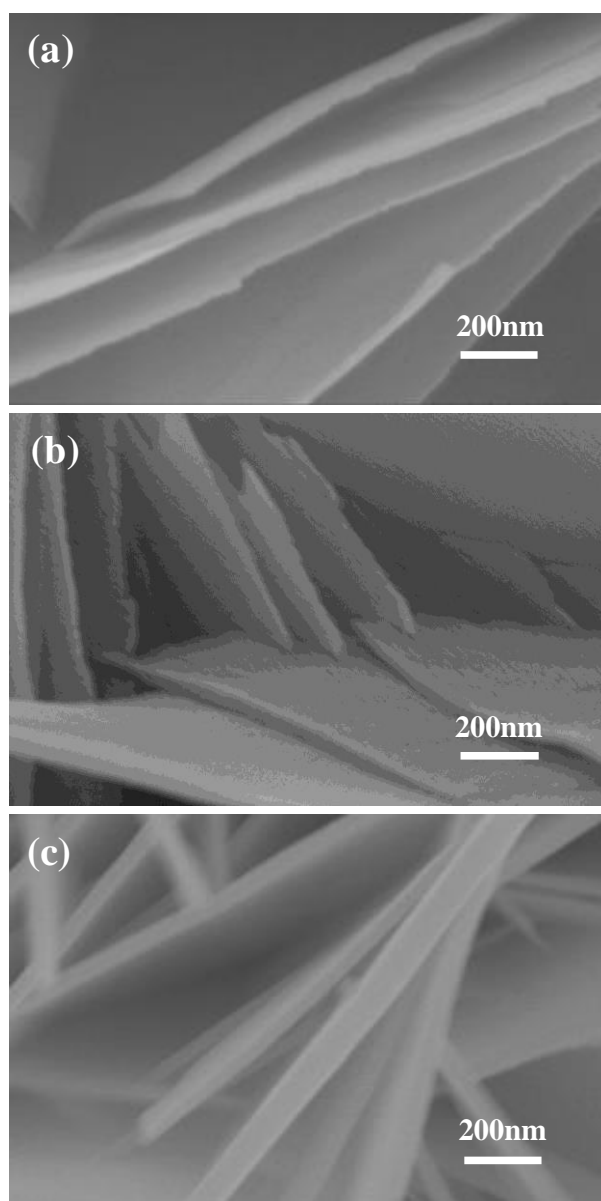

**Figure S2.** SEM images for  $\text{Co}_3\text{O}_4$  nanosheets anchored on SSM prepared using the  $\text{Co}(\text{NO}_3)_2$  solutions with varied concentrations: (a) 0.02 M, (b) 0.04 M and (c) 0.06 M.

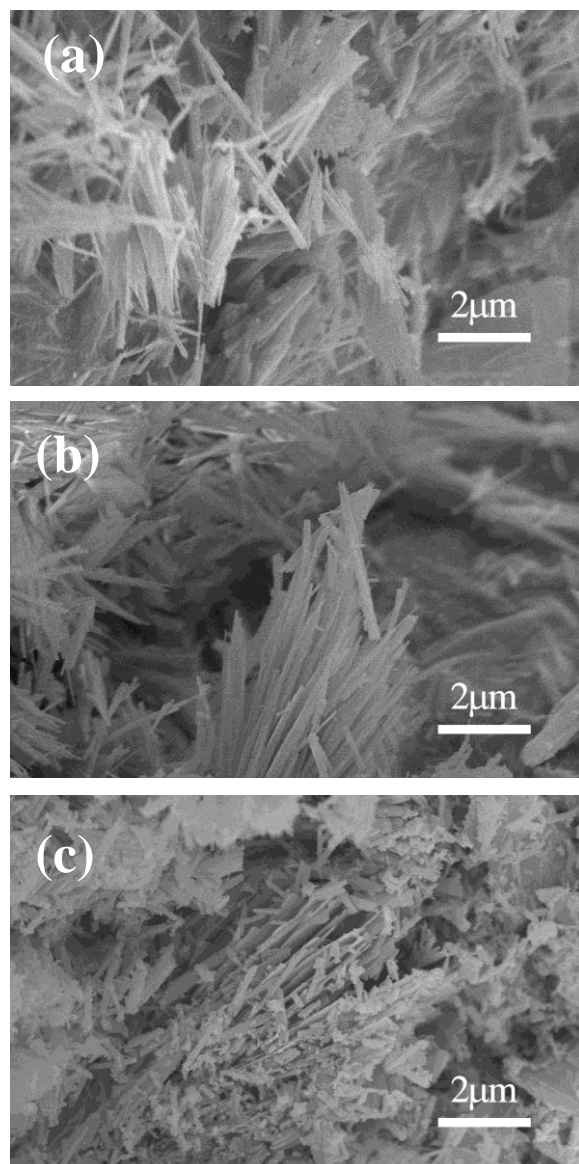

**Figure S3.** SEM images of the powdered  $\text{Co}_3\text{O}_4$  samples obtained using the  $\text{Co}(\text{NO}_3)_2$  solutions with varied concentrations: (a) 0.02 M, (b) 0.04 M, and (c) 0.06 M.

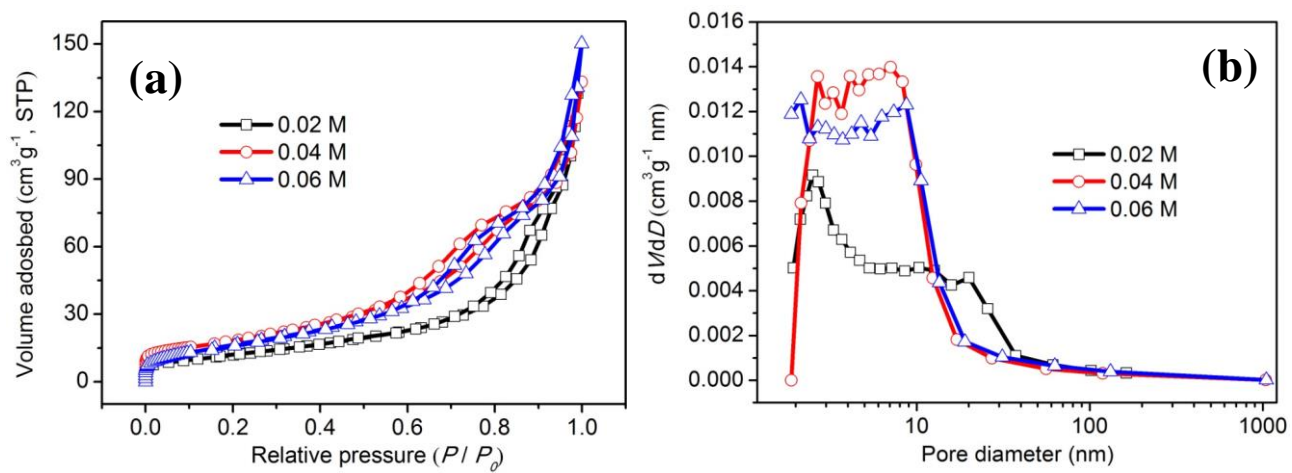

**Figure S4.** (a) Nitrogen sorption isotherm curves and (b) pore size distributions for the  $\text{Co}_3\text{O}_4$  samples prepared using the  $\text{Co}(\text{NO}_3)_2$  solutions with varied concentrations.

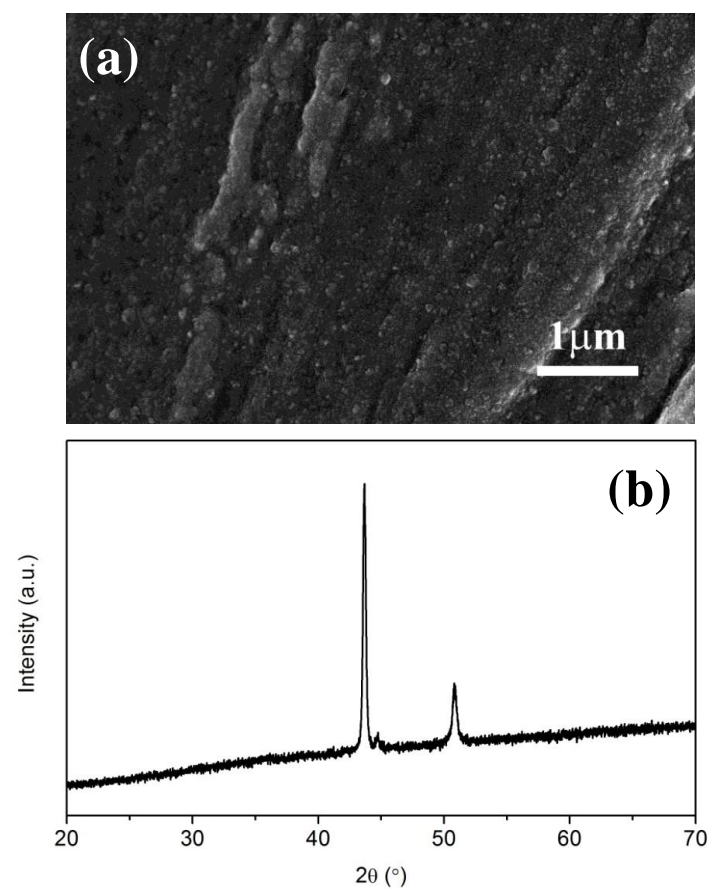

**Figure S5.** (a) SEM image and (b) XRD pattern for the “soil” coated SSM.

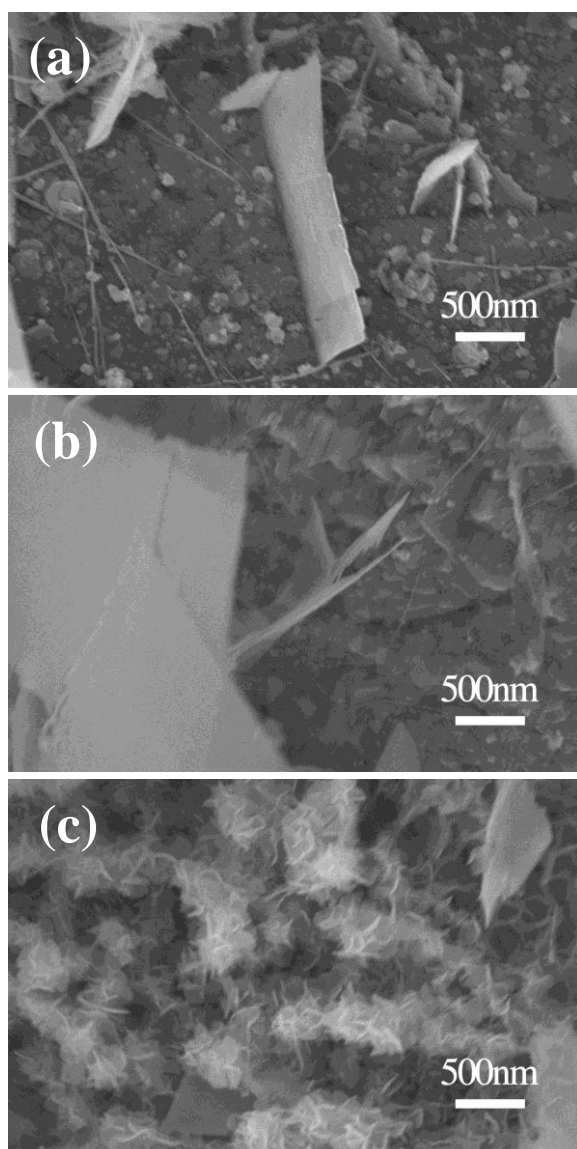

**Figure S6.** SEM images of the SSM surface underneath the nanosheet clusters for the samples prepared using the  $\text{Co}(\text{NO}_3)_2$  solutions with varied concentrations: (a) 0.02 M, (b) 0.04 M, and (c) 0.06 M.

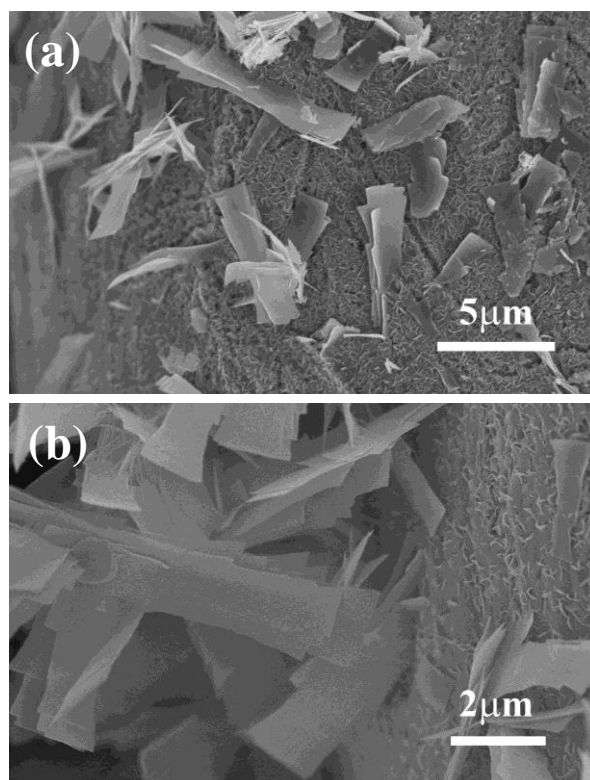

**Figure S7.** SEM images for the  $\text{Co}_3\text{O}_4@\text{SSM}$  sample prepared using 0.04 M  $\text{Co}(\text{NO}_3)_2$  solution and SSM substrate without the pre-deposited thin layer of cobalt oxide as the “soil”: (a) the nanosheets grown on SSM surface and (b) the nanosheet aggregation in mesh pores.



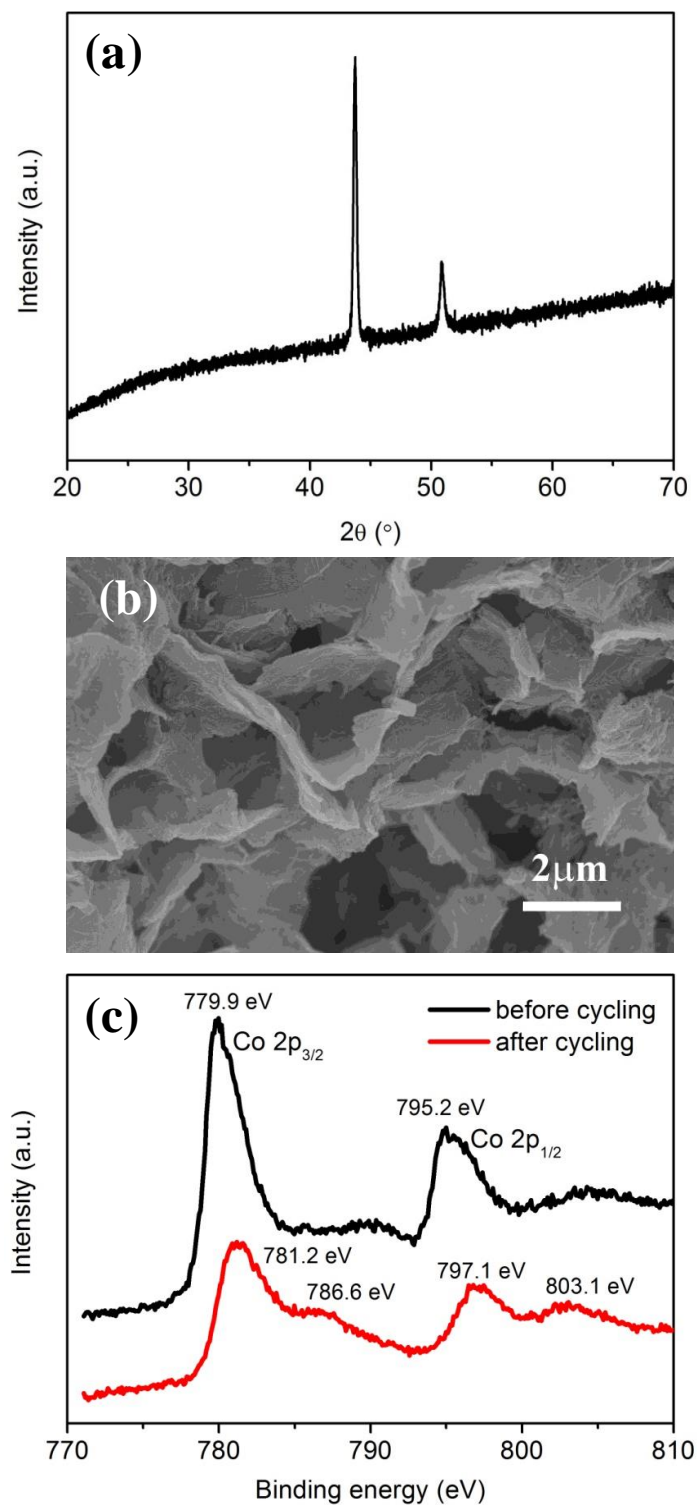

**Figure S8.** (a) XRD pattern and (b) SEM image for Co<sub>3</sub>O<sub>4</sub>@SSM (0.04) after 50 cycles, as well as (c) Co 2p XPS spectra for the electrode before and after cycling.
